# Supplementary material for: Decoding mitochondrial heterogeneity in single muscle fibres by imaging mass cytometry
Source: PubMed Central journal article supplement (PMC7501294; doi:10.1038/s41598-020-70885-3), 2020-09-18
Supplement: 41598_2020_70885_MOESM1_ESM.pdf [file 41598_2020_70885_MOESM1_ESM.pdf]

# Decoding mitochondrial heterogeneity in single muscle fibres by Imaging Mass Cytometry

Charlotte Warren<sup>1,4</sup>, David McDonald<sup>2</sup>, Roderick Capaldi<sup>3</sup>, David Deehan<sup>4</sup>, Robert W. Taylor<sup>1,5</sup>, Andrew Filby<sup>2</sup>, Doug M. Turnbull<sup>1,4</sup>, Conor Lawless<sup>1,\*</sup>, Amy E. Vincent<sup>1,4\*</sup>

<sup>1</sup> Wellcome Centre for Mitochondrial Research, Translational and Clinical Research Institute, Newcastle University, Newcastle upon Tyne, NE2 4HH, United Kingdom.

<sup>2</sup> Flow Cytometry Core Facility, Biosciences Institute, Newcastle University, Newcastle upon Tyne, NE2 4HH, United Kingdom

<sup>3</sup> Cellstate Biosciences, Tuscon, Arizona 85721, United States

<sup>4</sup> Translational and clinical Research Institute, Newcastle University, Newcastle upon Tyne, NE2 4HH, United Kingdom.

<sup>5</sup>NHS Highly Specialised Rare Mitochondrial Disorders Service, Newcastle upon Tyne Hospitals, NHS Foundation Trust, Newcastle upon Tyne, NE2 4HH, United Kingdom.

\*Corresponding author

## Correspondence:

Dr Amy E. Vincent (email: amy.vincent@ncl.ac.uk)

Dr Conor Lawless (email: conor.lawless@ncl.ac.uk)

Wellcome Centre for Mitochondrial Research

Translational and Clinical Research Institute Newcastle University

Framlington Place,

Newcastle upon Tyne

NE2 4HH, UK

**Supplementary Table 1: Patient information.** Information on patients detailing gender, age at biopsy, clinical information and genetic defect.

| Subjects                                                                                      | Gender | Age (years) | Clinical information                                                                                 | Genetic defect                                                                                                                                                                                                                                                                                                                                                                                                 | Previous reports                      |
|-----------------------------------------------------------------------------------------------|--------|-------------|------------------------------------------------------------------------------------------------------|----------------------------------------------------------------------------------------------------------------------------------------------------------------------------------------------------------------------------------------------------------------------------------------------------------------------------------------------------------------------------------------------------------------|---------------------------------------|
| <b>Pathogenic variants in nuclear-encoded proteins affecting complex I assembly</b>           |        |             |                                                                                                      |                                                                                                                                                                                                                                                                                                                                                                                                                |                                       |
| P01                                                                                           | M      | Adult       | Exercise intolerance, unable to perform sustained aerobic exercise normal resting lactate, normal CK | <i>TMEM126B</i> (NG_053120.1)<br>Homozygous c.635G>T, p.(Gly212Val) variant                                                                                                                                                                                                                                                                                                                                    | Ahmed <i>et al.</i> (2017) Patient 14 |
| P02                                                                                           | M      | Adult       | Exercise intolerance, muscle cramps, elevated serum lactate                                          | <i>ACAD9</i> (NG_017064.1)<br>Compound heterozygous c.1150G>A, p.(Val384Met) and c.1168G>A, p.(Ala390Thr) variant                                                                                                                                                                                                                                                                                              | Ahmed <i>et al.</i> (2017) Patient 15 |
| <b>Single, large-scale mtDNA deletions</b>                                                    |        |             |                                                                                                      |                                                                                                                                                                                                                                                                                                                                                                                                                |                                       |
| P03                                                                                           | F      | 29          | CPEO and bilateral ptosis                                                                            | Deletion size 4372bp<br>Breakpoints: 8929-13301<br>mtDNA deletion level: 53%<br>Deleted genes: part of <i>ATP6</i> , <i>MTCO3</i> , <i>MT-TG</i> , <i>ND3</i> , <i>MT-TR</i> , <i>ND4L</i> , <i>ND4</i> , <i>MT-TH</i> , <i>MT-S2</i> , <i>MT-L2</i> and part of <i>ND5</i>                                                                                                                                    | Rocha <i>et al.</i> (2018) Patient 4  |
| P04                                                                                           | F      | 39          | CPEO, diplopia                                                                                       | Deletion size 7498bp<br>Breakpoints: 7130-14628<br>mtDNA deletion level: 28%<br>Deleted genes: part of <i>MTCO1</i> , <i>MT-S1</i> , <i>MT-TD</i> , <i>MTCO2</i> , <i>MT-TK</i> , <i>ATP8</i> , <i>ATP6</i> , <i>MTCO3</i> , <i>MT-TG</i> , <i>ND3</i> , <i>MT-TR</i> , <i>ND4L</i> , <i>ND4</i> , <i>MT-TH</i> , <i>MT-S2</i> , <i>MT-LS</i> , <i>ND5</i> , <i>ND6</i> , <i>MT-TE</i> and part of <i>CYTb</i> | Rocha <i>et al.</i> (2018) Patient 19 |
| <b>Pathogenic variants in mitochondrially-encoded tRNA<sup>Leu(UUR)</sup> (<i>MT-TL1</i>)</b> |        |             |                                                                                                      |                                                                                                                                                                                                                                                                                                                                                                                                                |                                       |

|                                                               |   |    |                                                    |                                 |                                       |
|---------------------------------------------------------------|---|----|----------------------------------------------------|---------------------------------|---------------------------------------|
| P05                                                           | F | 25 | Exercise intolerance, ptosis                       | m.3243A>G <i>MT-TL1</i> variant | Rocha <i>et al.</i> (2015) Patient 12 |
| P06                                                           | F | 47 | Modest exercise intolerance                        | m.3243A>G <i>MT-TL1</i> variant | Rocha <i>et al.</i> (2015) Patient 15 |
| P07                                                           | M | 53 | CPEO                                               | m.3243A>G <i>MT-TL1</i> variant | Rocha <i>et al.</i> (2015) Patient 16 |
| <b>Point mutations in other mitochondrially-encoded tRNAs</b> |   |    |                                                    |                                 |                                       |
| P08                                                           | M | 33 | Mitochondrial myopathy                             | m.10010T>C <i>MT-TG</i> variant | Rocha <i>et al.</i> (2015) Patient 19 |
| P09                                                           | F | 35 | Mild muscle weakness                               | m.14709T>C <i>MT-TE</i> variant | Rocha <i>et al.</i> (2015) Patient 20 |
| P10                                                           | M | 63 | Exercise intolerance, prominent exertional dyspnea | m.5543T>C <i>MT-TW</i> variant  | Rocha <i>et al.</i> (2015) Patient 21 |
| <b>Healthy controls</b>                                       |   |    |                                                    |                                 |                                       |
| C01                                                           | M | 20 | Taken during anterior cruciate ligament surgery    | n.a                             |                                       |
| C02                                                           | M | 24 | Taken during anterior cruciate ligament surgery    | n.a                             |                                       |
| C03                                                           | F | 23 | Taken during anterior cruciate ligament surgery    | n.a                             |                                       |

CK; Creatine kinase, CPEO; Chronic progressive external ophthalmoplegia, n.a., not applicable

**Supplementary Table 2: List of primary and secondary antibodies.** Table includes details of antibodies such as host species, isotype, dilution used and supplier.

| Antibodies                     | Host and isotype | Dilution              | Company                     |
|--------------------------------|------------------|-----------------------|-----------------------------|
| <b>Primary antibodies</b>      |                  |                       |                             |
| Laminin (membrane marker)      | Rabbit           | 1:50                  | Sigma-Aldrich (L9393)       |
| Dystrophin (membrane marker)   | Mouse            | 1:50                  | EMD Millipore (Mab 1645)    |
| NDUFB8 (CI)                    | Mouse IgG1       | 1:50 (IMC) 1:100 (IF) | Abcam (110242)              |
| GRIM19 (CI)                    | Mouse IgG2b      | 1:50 (IMC) 1:100 (IF) | Abcam (110240)              |
| SDHA (CII)                     | Mouse IgG1       | 1:50 (IMC) 1:100 (IF) | Abcam (14715)               |
| UqcCRC2 (C III)                | Mouse IgG1       | 1:50 (IMC) 1:100 (IF) | Abcam (14745)               |
| MTCO1 (CIV)                    | Mouse IgG2a      | 1:50 (IMC) 1:100 (IF) | Abcam (14705)               |
| COX4+4L2 (CIV)                 | Mouse IgG2a      | 1:50 (IMC) 1:100 (IF) | Abcam (110261)              |
| OSCP CV)                       | Mouse IgG1       | 1:50 (IMC) 1:100 (IF) | Abcam (110276)              |
| VDAC1 (mass marker)            | Mouse IgG2b      | 1:50 (IMC) 1:100 (IF) | Abcam (14734)               |
| <b>Secondary antibodies</b>    |                  |                       |                             |
| Anti-rabbit Alexa Fluor 405nm  | Goat             | 1:100                 | Life Technologies (A31556)  |
| Anti-IgG2a Alexa Fluor 488nm   | Goat             | 1:200                 | Life Technologies (A21131)  |
| Anti-IgG2b Alexa Fluor 546nm   | Goat             | 1:200                 | Life Technologies (A21143)  |
| Anti-IgG1 biotin               | Goat             | 1:200                 | Life Technologies (A10519)  |
| Streptavidin Alexa Fluor 647nm | Goat             | 1:100                 | Life Technologies (S32357)  |
| Anti-IgG1 Alexa Fluor 647nm    | Goat             | 1:200                 | Life Technologies (AA21240) |
| Anti-mouse IgG Alexa Fluor 488 | Goat             | 1:200                 | Life Technologies (A11001)  |

**Supplementary Table 3: Antibodies and their respective metal conjugates.**

| <b>Antibody</b> | <b>Metal conjugate</b> |
|-----------------|------------------------|
| Dystrophin      | 176Yb                  |
| UqCRC2          | 174Yb                  |
| MTCO1           | 172Yb                  |
| COX4+4L2        | 168Er                  |
| SDHA            | 153Eu                  |
| VDAC1           | 166Er                  |
| GRIM19          | 164Dy                  |
| OSCP            | 161Dy                  |
| NDUFB8          | 160Gd                  |

**Supplementary Table 4: Antibody combinations for comparison of Imaging mass cytometry and immunofluorescences. Combinations of antibodies for quadruple immunofluorescence.**

| Combination 1 | Combination 2 | Combination 3 | Combination 4 | Combination 5 |
|---------------|---------------|---------------|---------------|---------------|
| Laminin       | Laminin       | Laminin       | Laminin       | Laminin       |
| NDUFB8        | NDUFB8        | SDHA          | OSCP          | UqCRC2        |
| MTCO1         | COX4+4L2      | TOMM22        | MTCO1         | MTCO1         |
| VDAC1         | VDAC1         | GRIM19        | VDAC1         | VDAC1         |

- Ahmed, S. T., Alston, C. L., Hopton, S., He, L., Hargreaves, I. P., Falkous, G., . . . Taylor, R. W. (2017). Using a quantitative quadruple immunofluorescent assay to diagnose isolated mitochondrial Complex I deficiency. *Scientific reports*, 7(1), 15676-15676. doi:10.1038/s41598-017-14623-2
- Rocha, M. C., Grady, J. P., Grünewald, A., Vincent, A., Dobson, P. F., Taylor, R. W., . . . Rygiel, K. A. (2015). A novel immunofluorescent assay to investigate oxidative phosphorylation deficiency in mitochondrial myopathy: understanding mechanisms and improving diagnosis. *Scientific reports*, 5(1), 15037. doi:10.1038/srep15037
- Rocha, M. C., Rosa, H. S., Grady, J. P., Blakely, E. L., He, L., Romain, N., . . . Turnbull, D. M. (2018). Pathological mechanisms underlying single large-scale mitochondrial DNA deletions. *Ann Neurol*, 83(1), 115-130. doi:10.1002/ana.25127
